# Supplementary material for: Wrangling Phosphoproteomic Data to Elucidate Cancer Signaling Pathways
Source: PLoS One. 2013 Jan 3;8(1):e52884. doi: 10.1371/journal.pone.0052884 (PMC3536783; doi:10.1371/journal.pone.0052884)
Supplement: Rcommands S1 — LC_PLoS_ONE_Rcommands.R. R script commands for processing phosphoproteomic data. (R) [file pone.0052884.s012.r]

#
#
#	R Commands for processing phosphoproteomic data.
#		Author: Mark Grimes, Division of Biological Sciences, University of Montana
#				Mark.Grimes@mso.umt.edu
#
#	Example data "20070918_spectrumtable.txt" 
#				 tab delim from http://www.phosphosite.org/suppData/RikovaCell/20070918_spectrumtable.xls
#
#  libraries required for MG's commands and scripts
#
#  use install.packages("package_name") to download the package
#  or, for bioconductor packages:
# 	source("http://www.bioconductor.org/biocLite.R")
# 	biocLite("RCytoscape") 
#
#
	library(plyr)
	 library(Hmisc)
	 library(cluster)
	 library(adegenet)
	library(bio3d)
	library("RUnit")
	library(vegan)
	library(tsne)
	library ("gplots")
	#	bioconductor packages
	library(RCytoscape)
	library('org.Hs.eg.db')
	library (GO.db)
	library (Category)
	library (GOstats)
	#
	# this last, due to a problem with R 2.14.2
		library(rgl)
	# Load MG-written functions
		source("LC_PLoSONE_Rfunctions.R")
#___________________________________________________________________________________
#
#  Work with SpectrumTable
#
	datafilename = "20070918_spectrumtable.txt" # tab delim from http://www.phosphosite.org/suppData/RikovaCell/20070918_spectrumtable.xls
	skip.rows = 0
	 datafile <-read.table(datafilename, sep = "\t", skip = skip.rows, header=TRUE, blank.lines.skip=T, fill=T, quote="", dec=".", comment.char = "", encoding = "unknown")  # dim  64693    11
	d <- datafile[,c(1, 4, 5, 10:11)]  # Keep Acession Numbers for mapping
################
##
#	Mapping
#
 	d$First.Gene.Name<-sapply(datafile$Gene.Names, get.gene)
#
# # # # # # # # # # # # # # # # # # # # # # # # # 
#   Map with library('org.Hs.eg.db')
#
#	Use org.Hs.egUNIPROT, then org.Hs.egGENENAME to go from UNIPROT to ENTREZ to GENENAME
	#
		d$geneID <- sapply(d$PhosphoSite.Accession.Numbers, uni2geneID)		
		d$Symbol <- sapply(d$geneID, geneID2sym) 
			good1 <- which(!is.na(d$Symbol))  # 60990
			bad1 <- which(is.na(d$Symbol))  #  3703
			# setdiff(d[good1, 6]  ,  d[good1, 8])  # 202
			#  keep Symbols defined by Accession numbers
			# replace undefined Symbols
			d[bad1,8] <- d[bad1, 6]			
			# replace Similar to RGS12 with RGS12; C11orf58 with SMAP 
			wrong <- c("Similar to RGS12", "C11orf58")
			right <- c("RGS12", "SMAP")
			rrows1 <- row.names( d[d$Symbol %in% wrong[1],] )
			rrows2 <- row.names ( d[d$Symbol %in% wrong[2],] )
			d[rrows1, 8] <- right[1]
			d[rrows2, 8] <- right[2]
			# setdiff(d$Symbol, d$First.Gene.Name)  # 199
		#
  	LungCancerGenes <- unique(as.character(d$Symbol))  # length 2482
 	write.table(sort(LungCancerGenes), file= "LungCancerGenes.txt", sep="\t", eol = "\n", quote = FALSE, row.names=FALSE, col.names=FALSE) # For String
 	write.table(d, file= "LungCancer_mapped.txt", sep="\t", eol = "\n", quote = FALSE, row.names=FALSE, col.names=FALSE) # For the record
###
#  Make a useable table
	lungdata <- extract.data(a) # dim = 2482  234 
	# intersect(samples, names(lungdata)) # all samples, 233
	# intersect(LungCancerGenes, lungdata$Gene.Name) # = 2482
#	
	 # make zeros into NA
	 lungtbl <- NA.zero(lungdata)
#
	write.table(lungdata, file= "LungCancerData0.txt", sep="\t", eol = "\n", quote = FALSE, row.names=FALSE)		
	write.table(lungtbl, file= "LungCancerData.txt", sep="\t", eol = "\n", quote = FALSE, row.names=FALSE)
#
###############################
#
# Distance Matrix 
#
#
#  Strategy: 
#		Isolate gene clusters by dissimilarity (Spearman, Euclidean), then get subnetwork and edges
#			functions: select_nodes; get_String_edges; get_GM_edges; PSP_child; edge_merge

#
#######
#
#	Prune data file for distance matrix 
#
	    tbl=data.matrix(lungtbl[ , c(2:ncol(lungtbl))])
		rownames (tbl) = lungtbl$Gene.Name
	#
	#   New method for normalization: scale
	#	(To scale by the standard deviations without centering, use scale(x,center=FALSE,scale=apply(x,2,sd,na.rm=TRUE)).)
		tbl.sc <- scale(tbl, center=FALSE,scale=apply(tbl,2,sd,na.rm=TRUE))
	#
	#	Compare 1 - abs(Pearson Correlation) and 1 - abs(Spearman Correlation) as distance	
	#	
		cf.cor_s.sc <- cor(t(tbl.sc), use = "pairwise.complete.obs", method = "spearman")
		cf.cor.sc <- cor(t(tbl.sc),  use = "pairwise.complete.obs", method = "pearson")
		dissimilarity_s.sc <- 1 - abs(cf.cor_s.sc)
		dissimilarity.sc <- 1 - abs(cf.cor.sc)
		distance_s.sc <- as.dist(dissimilarity_s.sc)
		distance.sc <- as.dist(dissimilarity.sc) # ***
		dsz.sc <- distance_s.sc # *
		dpz.sc <- distance.sc # *
	# Assume that a distance of NA is large:
	#	set NA to two orders of magnitude higher than max distance
		dpz.sc[is.na(dpz.sc)] <- 100*max(dpz.sc, na.rm=T)
		dpz.sc.ord3 <- cmdscale(dpz.sc, k=3) 
		dsz.sc[is.na(dsz.sc)] <- 100*max(dsz.sc, na.rm=T)
		dsz.sc.ord3 <- cmdscale(dsz.sc, k=3)
		dsz.sc.test <- cmdscale(as.matrix(dsz.sc), k=2) # plot this, no difference
	#
	# Or, more simply use functions that do all this:
		dpz.sc.ord3 <- dist.Pearson(tbl.sc)
		dsz.sc.ord3 <- dist.Spearman(tbl.sc)
		#
 	#
	# 	Eucledian Distance on scaled table
	#
		# Compute Distance Matrix
		dm.sc = dist (tbl.sc, method = "euclidean")  # ***
	# set NA to two orders of magnitude higher than max distance
		dmz.sc <- as.matrix (dm.sc)
		dmz.sc[is.na(dmz.sc)] <- 100*max(dmz.sc, na.rm=T)
		dmz.sc.ord <- cmdscale(dmz, k=3) 
		dmz.sc.test <- cmdscale(as.dist(dmz), k=3) # plot shows exactly same data structure; only axes numbers change
	# Or the all-in-a-function version:
		dmz.sc.ord3 <- dist.Euclid(tbl.sc)  # these are now set to k=3 for three dimensions
		# for comparison
			ztbl.sc <- tbl.sc
 			ztbl.sc[is.na(ztbl.sc)] <- 0	
 			zdmz.ord3 <- dist.Euclid(ztbl.sc)
 				plot(zdmz.ord3,  main="", col="red", xlab="Euclidian Distance w/zeros - x", ylab = "y", font =2, font.lab = 2, cex.lab=3.5/2.5, cex.axis=3.5/2.5)
 				plot(dmz.sc.ord3,  main="Euclidian Distance", col="blue", xlab="Euclidian Distance - x", ylab = "y", font.lab = 2)
 				points(zdmz.ord3, col= 'red')
 			zdsz.ord3 <- dist.Spearman(ztbl.sc)
 				plot(zdsz.ord3,  main="", col="red", xlab="Spearman Distance w/zeros - x", ylab = "y", font =2, font.lab = 2)
 				negx.zdsz.ord3 <- cbind(-zdsz.ord3[,1], zdsz.ord3[,2:3])
 				plot(negx.zdsz.ord3,  main="", col="red", xlab="Spearman Distance w/zeros - x", ylab = "y", font =2, font.lab = 2, cex.lab=3.5/2.5, cex.axis=3.5/2.5)
  				negy.dsz.sc.ord3 <- cbind(dsz.sc.ord3[,1], -dsz.sc.ord3[,2], dsz.sc.ord3[,3])
				plot(dsz.sc.ord3,  main="Spearman Distance", col="blue", xlab="Spearman Distance - x", ylab = "y", font.lab = 2)
				plot(negy.dsz.sc.ord3,  main="Spearman Distance", col="blue", xlab="Spearman Distance - x", ylab = "y", font.lab = 2, cex.lab=3.5/2.5, cex.axis=3.5/2.5)
 				points(negx.zdsz.ord3, col= 'red')
	#	
	#	Plot the data in 3D
		#  Multidimensional scaling finds minimum optimum coordinates, which may be reflected on one or more axes, 
		plot3d(dpz.sc.ord3); plot3d(dsz.sc.ord3)	# note that plots are inverted in z dimension
			plot(dpz.sc.ord3[,3]~dsz.sc.ord3[,3])  # straight line slope = -1
			plot(dpz.sc.ord3[,3]~negdsz[,3])  # now straight line slope=1; one outlier
			#			
			negdsz <- cbind(dsz.sc.ord3[,1:2], -dsz.sc.ord3[,3])
			plot3d(dpz.sc.ord3 - negdsz) # diffs except for one point are small	
		plot3d(dmz.sc.ord3) # note difference in scale
#
#]})>=-  To combine Pearson (or Spearman) distance matricies: 
#				Make distance matrices the same scale
#				THEN combine them
#				THEN to cmdscale or t-SNE
#
		dm.sc.1 <- dm.sc/max(dm.sc, na.rm=T)  # now max=1 as for dsz.sc
		dmz.sc.1 <- dm.sc.1
		dmz.sc.1[is.na(dmz.sc.1)] <- 100*max(dmz.sc.1, na.rm=T)
		dmz.sc.1 <- as.dist(dmz.sc.1)	
		dmz.ord3 <- cmdscale(dmz.sc.1, k=3)
	# Combine dmz.sc.1 with dpz.sc and dsz.sc 
	ped <- (dmz.sc.1 + dpz.sc)/2
	sed <- (dmz.sc.1 + dsz.sc)/2
	ped.ord3 <- cmdscale(ped, k=3) 
	sed.ord3 <- cmdscale(sed, k=3)
	# coordinates are arbitrary, so match to dmz for comparison
	negx.sed.ord3 <- cbind(-sed.ord3[,1], sed.ord3[,2:3])
				plot3d(negx.sed.ord3-dmz.ord3)
				plot(negx.sed.ord3~dmz.ord3)  #  slope = ~1, so orientation is similar
 				plot(dmz.ord3,  main="Scaled Euclidian Distance", col="purple", xlab="Euclidiean Distance - x", ylab = "y", font.lab = 2)		
 				plot(negx.sed.ord3,  main="Spearman-Euclidian Distance", col="darkgreen", xlab="Spearman-Euclidian Distance - x", ylab = "y", font.lab = 2)
 				points(dmz.ord3, col= 'blue')
 				plot()
 				negy.dsz.sc.ord3 <- cbind(dsz.sc.ord3[,1], -dsz.sc.ord3[,2], dsz.sc.ord3[,3])
  				points(negy.dsz.sc.ord3, col= 'red')
  				
	# Write matrices of distance matrices
	write.table(data.frame(as.matrix(dmz.sc.1)), file= "LungCancer_Euclid_dist.txt", sep="\t", eol = "\n", quote = FALSE, row.names=TRUE, col.names=TRUE)
	write.table(data.frame(as.matrix(dpz.sc)), file= "LungCancer_Pearson_dist.txt", sep="\t", eol = "\n", quote = FALSE, row.names=TRUE, col.names=TRUE)
	write.table(data.frame(as.matrix(dsz.sc)), file= "LungCancer_Spearman_dist.txt", sep="\t", eol = "\n", quote = FALSE, row.names=TRUE, col.names=TRUE)
	write.table(data.frame(as.matrix(ped)), file= "LungCancer_PED_dist.txt", sep="\t", eol = "\n", quote = FALSE, row.names=TRUE, col.names=TRUE)
	write.table(data.frame(as.matrix(sed)), file= "LungCancer_SED_dist.txt", sep="\t", eol = "\n", quote = FALSE, row.names=TRUE, col.names=TRUE)

	# 
	plot3d(sed.ord3-ped.ord3)
	# differences are insignificant between Spearman and Pearson
	# for comparison	
	plot3d(dmz.ord3) #  now reflected
    		negdmz <- cbind(-dmz.ord3[,1], dmz.ord3[,2:3])
    	plot3d(sed.ord3 -  negdmz)
    	plot3d(ped.ord3 -  negdmz)
    	# These plots show the influence of Pearson (Spearman) on the distance matrix
 #
#
#	Data Structure Exploration 
#    	
	# First get the data structures in the same orientation as ped.ord3
		# negdmz and ped.ord3 are in the same orientation
		negdpz <- cbind(-dpz.sc.ord3[,1], -dpz.sc.ord3[,2], dpz.sc.ord3[,3])
	#
	# Write pdb files for PyMol
		setwd("_LC_movie")
		write.pdb(xyz=as.numeric(t(100*scale(ped.ord3))),  file = "LC_PED.pdb") 
		write.pdb(xyz=as.numeric(t(100*scale(negdmz))),  file = "LC_Euclid.pdb")
		write.pdb(xyz=as.numeric(t(100*scale(negdpz))),  file = "LC_Pearson.pdb")
	#
#
# t-SNE 
#______________________________________________
#
	#	install.packages("tsne")	
	# 		library (tsne)
	#
#	distance matrices: scaled: dpz.sc (Pearson); dsz.sc (Spearman); dmz.sc.1 (Euclid); ped, sed (combined Pearson/Euclid or Spearman/Euclid)
#
#  start with k= 2 (two dimensional); perplexity at 30 for this data set
#
	dpz.tsne.dist <- tsne(dpz.sc, initial_config = NULL, k = 2, initial_dims = 30, perplexity = 30, max_iter = 1000, min_cost = 0, epoch_callback = NULL, whiten = TRUE, epoch=100)  
	# defaults
	#  Epoch: Iteration #1000 error is: 1.40364307669397
	plot(dpz.tsne) # a funny cloud
	#
	sed.tsne.dist <- tsne(sed, initial_config = NULL, k = 2, initial_dims = 30, perplexity = 30, max_iter = 1000, min_cost = 0, epoch_callback = NULL, whiten = TRUE, epoch=100)  # tsne_0.1-2  
	# Epoch: Iteration #1000 error is: 2.85972434542052
	# plot(sed.tsne.dist): a cloud
	#
	# 	Try directly on distance matrix
	dm.tsne.dist <- tsne(dm.sc, initial_config = NULL, k = 2, initial_dims = 30, perplexity = 30, max_iter = 1000, min_cost = 0, epoch_callback = NULL, whiten = TRUE, epoch=100)  
	#  doesn't work   
##########################################################################################################
	#
	# 	Use distance matrices as 'features vectors' instead of distances
	#
	# Spearman Distance 2D t-SNE = dsz; Euclidean distance = dez; SED 2D = sed2; SED 3D = sed3
#
	dpz.tsne <- tsne(data.frame(as.matrix(dpz.sc)), initial_config = NULL, k = 2, initial_dims = 30, perplexity = 30, max_iter = 1000, min_cost = 0, epoch_callback = NULL, whiten = TRUE, epoch=100)  
	# Epoch: Iteration #1000 error is: 1.05230339759969
	#  NOTE: one large unresolved group
	#
		dpz.span2 <- spantree(dist(dpz.tsne), toolong=1.5)
		dpz.disc2 <-  distconnected(dist(dpz.tsne), toolong = 1.5, trace = TRUE)  # toolong=3.5 12 groups; =2, 60; =1.5, 113
		ordiplot(dpz.tsne)
				lines(dpz.span2, dpz.tsne)
		ordihull(dpz.tsne, dpz.disc2, col="blue", lwd=2)	# groups!  toolong 2.5 looks reasonable # *> Possible Figure
		 plot(dpz.span2, dpz.tsne, cex = 0.7, type = "p", labels, dlim, FUN = sammon) # *> Possible Figure (same as lines())	
		# Find groups
		dpz.span2.df <- data.frame(rownames(tbl.sc))
		names(dpz.span2.df) <- "Gene.Name"
		dpz.span2.df$group <- dpz.disc2
		dpz.span2.list <- dlply(dpz.span2.df, .(group))  # GROUP LIST  !
		dpz.span2.df[which(dpz.span2.df$Gene.Name=="ALK"),]	# 38; contains both EML1 and EML4!
	#	
	#	
	dsz.tsne <- tsne(data.frame(as.matrix(dsz.sc)), initial_config = NULL, k = 2, initial_dims = 30, perplexity = 30, max_iter = 1000, min_cost = 0, epoch_callback = NULL, whiten = TRUE, epoch=100)
	# Epoch: Iteration #1000 error is: 1.04545243129944
	#  NOTE: one large unresolved group
		dsz.span2 <- spantree(dist(dsz.tsne), toolong=1.5)
		dsz.disc2 <-  distconnected(dist(dsz.tsne), toolong = 1.5, trace = TRUE)  # toolong= =1.5, 101 groups
		ordiplot(dsz.tsne)
				lines(dsz.span2, dsz.tsne)
		ordihull(dsz.tsne, dsz.disc2, col="blue", lwd=2)	# groups!  toolong 2.5 looks reasonable # *> Possible Figure
		 plot(dsz.span2, dsz.tsne, cex = 0.7, type = "p", labels, dlim, FUN = sammon) # *> Possible Figure (same as lines())	
		# Find groups
		dsz.span2.df <- data.frame(rownames(tbl.sc))
		names(dsz.span2.df) <- "Gene.Name"
		dsz.span2.df$group <- dsz.disc2
		dsz.span2.list <- dlply(dsz.span2.df, .(group))  # GROUP LIST  !
		dsz.span2.df [which(dsz.span2.df$Gene.Name=="ALK"),]	# 38; contains both EML1 and EML4!
		#
	dez.tsne <- tsne(data.frame(as.matrix(dmz.sc.1)), initial_config = NULL, k = 2, initial_dims = 30, perplexity = 30, max_iter = 1000, min_cost = 0, epoch_callback = NULL, whiten = TRUE, epoch=100)  # defaults 
	# Epoch: Iteration #1000 error is: 0.502386338296623
	#
		dez.span2 <- spantree(dist(dez.tsne), toolong=3.5)
		dez.disc2 <-  distconnected(dist(dez.tsne), toolong = 3.5, trace = TRUE)  # toolong=2.5 201 groups; =3, 161; =3.5, 111
		ordiplot(dez.tsne)
				lines(dez.span2, dez.tsne)
		ordihull(dez.tsne, dez.disc2, col="blue", lwd=2)	# groups!  toolong 2.5 looks reasonable # *> Possible Figure
		 plot(dez.span2, dez.tsne, cex = 0.7, type = "p", labels, dlim, FUN = sammon) # *> Possible Figure (same as lines())	
		# Find groups
		dez.span2.df <- data.frame(rownames(tbl.sc))
		names(dez.span2.df) <- "Gene.Name"
		dez.span2.df$group <- dez.disc2
		dez.span2.list <- dlply(dez.span2.df, .(group))  # GROUP LIST  !
		dez.span2.df[which(dez.span2.df$Gene.Name=="ALK"),] # 44; similar to sed with toolong=2.5
	#
	sed.df <- data.frame(as.matrix(sed))
	sed2.tsne.list <- tsne(sed.df, initial_config = NULL, k = 2, initial_dims = 30, perplexity = 30, max_iter = 1000, min_cost = 0, epoch_callback = NULL, whiten = TRUE, epoch=100)	
	# tsne 0.1-1
		sed.tsne2d <- sed2.tsne$ydata
		rownames(sed.tsne2d) <- rownames(sed.df)
		#
		# Plot very similar to Euclid, maybe more resolution of some groups
		dev.new()
		sed.span2 <- spantree(dist(sed.tsne2d), toolong=3.25)
		sed.disc2 <-  distconnected(dist(sed.tsne2d), toolong = 3.35, trace = TRUE)  # toolong=4 73 groups; =2, 240; =3, 121; =2.5, 164; =3.5, 93; =3.25, 104; 3.35, 100
		ordiplot(sed.tsne2d)
		sed2d.fixy	 <- sed.tsne2d
		sed2d.fixy[,2] <- -sed2d.fixy[,2]
				sed.spanfixy <- spantree(dist(sed2d.fixy), toolong=3.35)
				lines(sed.spanfixy, sed2d.fixy)
				lines(sed.span2, sed.tsne2d)
		ordiplot(sed2d.fixy)
		sed.disc2f <-  distconnected(dist(sed2d.fixy), toolong = 3.35, trace = TRUE)  # toolong=4 73 groups; =2, 240; =3, 121; =2.5, 164; =3.5, 93; =3.25, 104; 3.35, 100
		ordihull(sed.tsne2d, sed.disc2, col="purple", lwd=2)	# figure
		ordihull(sed2d.fixy, sed.disc2f, col="red", lwd=2)	# new figure
		 plot(spantsne2, sed.tsne2d, cex = 0.7, type = "p", labels, dlim, FUN = sammon) # *> Possible Figure (same as lines())	
		# Find groups
		sed.span2.df <- data.frame(rownames(tbl.sc))
		names(sed.span2.df) <- "Gene.Name"
		sed.span2.df$group <- sed.disc2
		sed.span2.list <- dlply(sed.span2.df, .(group))  # GROUP LIST  !
		sed.span2.df[which(sed.span2.df$Gene.Name=="ALK"),] # 25; large group, NOT EML4
#
#	Since these are feature vectors, this may work
		cf.cor_s.sc <- cor(t(tbl.sc), use = "pairwise.complete.obs", method = "spearman")
		cf.cor.sc <- cor(t(tbl.sc),  use = "pairwise.complete.obs", method = "pearson")
		pearfeature <- cf.cor.sc
		pearfeature[is.na(pearfeature)] <- 0
		spearfeature <- cf.cor.sc
		spearfeature[is.na(spearfeature)] <- 0
	rawpearson.tsne <- tsne(data.frame(as.matrix(pearfeature)), initial_config = NULL, k = 2, initial_dims = 30, perplexity = 30, max_iter = 1000, min_cost = 0, epoch_callback = NULL, whiten = TRUE, epoch=100)  # defaults 
	# R(476,0xac88a2c0) malloc: *** mmap(size=49283072) failed (error code=12)
	#	*** error: can't allocate region
	#	*** set a breakpoint in malloc_error_break to debug 
	#	must be a problem with zeros correlating with each other; finished anyway
	#	Epoch: Iteration #1000 error is: 1.23440449754399
	# somewhat similar to dpz, dsz; one large unresolved group
		rawpearson.span2 <- spantree(dist(rawpearson.tsne), toolong=1.25)
		rawpearson.disc2 <-  distconnected(dist(rawpearson.tsne), toolong = 1.25, trace = TRUE)  # toolong= =1.5, 79 groups; =1.25, 107
		ordiplot(rawpearson.tsne)
				lines(rawpearson.span2, rawpearson.tsne)
		ordihull(rawpearson.tsne, rawpearson.disc2, col="blue", lwd=2)	
		 plot(rawpearson.span2, rawpearson.tsne, cex = 0.7, type = "p", labels, dlim, FUN = sammon) # *> Possible Figure (same as lines())	
		# Find groups
		rawpearson.span2.df <- data.frame(rownames(tbl.sc))
		names(rawpearson.span2.df) <- "Gene.Name"
		rawpearson.span2.df$group <- rawpearson.disc2
		rawpearson.span2.list <- dlply(rawpearson.span2.df, .(group))  # GROUP LIST  !
		rawpearson.span2.df [which(rawpearson.span2.df$Gene.Name=="ALK"),]	# 38; contains neither EML1 or EML4!
#		Shorter version: make function make.clusterlist()
	dpz.span2.list <- make.clusterlist(dpz.tsne, 1.6) # 100 groups
	dsz.span2.list <- make.clusterlist(dsz.tsne, 1.55) # 100 groups
	dez.span2.list <- make.clusterlist(dez.tsne, 3.61) # 100 groups
	sed.span2.list <- make.clusterlist(sed.tsne2d, 3.35) # 100
	rawpearson.span2.list <- make.clusterlist(rawpearson.tsne, 1.32) # 100 groups
	#
#	3D tsne with data frames: these are called 'features vectors' instead of distances
#
	#	Use SED because max = 100 instead of 99.99998 and rank assumes no linearity like Pearson
	#	 tsne_0.1-1 had probability matrix but did not handle distance objects
	# 
	sed.df <- data.frame(as.matrix(sed))
	sed3d.tsne <- tsne(sed.df, initial_config = NULL, k = 3, initial_dims = 30, perplexity = 30, max_iter = 1000, min_cost = 0, epoch_callback = NULL, whiten = TRUE, epoch=100)	
	# Epoch: Iteration #1000 error is: 0.52151837196313
		plot3d(sed.tsne$ydata)
		plot(sed.tsne$ydata, xlim=c(-10, 10), ylim=c(-10, 10))
	sed.tsne3d <- sed.tsne$ydata
	rownames(sed.tsne3d) <- rownames(sed.df)
	write.pdb(xyz=as.numeric(t(100*scale(sed.tsne3d))),  file = "LC_SED_tsne.pdb") 
	#
	sed.list <- make.clusterlist(sed.tsne3d, 4.88) # toolong= 4.88, 100 groups
	#  
	# Euclid tsne
	#
	euclid.tsne <- tsne(dmz.df, initial_config = NULL, k = 3, initial_dims = 30, perplexity = 30, max_iter = 1000, min_cost = 0, epoch_callback = NULL, whiten = TRUE, epoch=100)	
	# Epoch: Iteration #1000 error is: 0.492490204655265
	plot3d(euclid.tsne$ydata)
	euclid.tsne3d <- euclid.tsne$ydata
	rownames(euclid.tsne3d) <- rownames(dmz.df)
	write.pdb(xyz=as.numeric(t(100*scale(euclid.tsne3d))),  file = "LC_Euclid_tsne.pdb") 
	#
	euclid.list <- make.clusterlist(euclid.tsne3d, 4.5) # toolong= 4.88, 87 groups; =4.5 100 groups
	#  
	# Spearman tsne
	#
	dsz.df <- data.frame(as.matrix(dsz.sc))
	spearman.tsne <- tsne(dsz.df, initial_config = NULL, k = 3, initial_dims = 30, perplexity = 30, max_iter = 1000, min_cost = 0, epoch_callback = NULL, whiten = TRUE, epoch=100)	
	# 
	plot3d(spearman.tsne$ydata)
	spearman.tsne3d <- spearman.tsne$ydata
	rownames(spearman.tsne3d) <- rownames(dsz.df)
	write.pdb(xyz=as.numeric(t(100*scale(spearman.tsne3d))),  file = "LC_Spearman_tsne.pdb") 
	#  
	spearman.list <- make.clusterlist(spearman.tsne3d, 4.88) # toolong= 4.8, 176 groups;=4.8 85 groups; 4.88, 101 groups
	#
		#  
	# 3D sed tsne: call cmdscale results a 'feature vector'
	#
	cmdsed3d.tsne <- tsne(sed.ord3, initial_config = NULL, k = 3, initial_dims = 30, perplexity = 30, max_iter = 1000, min_cost = 0, epoch_callback = NULL, whiten = TRUE, epoch=100)	
	# Epoch: Iteration #1000 error is: 0.366179084540285
	# 
	cmdsed3d.list <- make.clusterlist(cmdsed3d.tsne, 2.81) # 101 groups
	#
		# Laurens' suggestion
	 sed.ord10 <- cmdscale(sed, k=10)
	 cmdsed10d.tsne <- tsne(sed.ord3, initial_config = NULL, k = 2, initial_dims = 30, perplexity = 30, max_iter = 1000, min_cost = 0, epoch_callback = NULL, whiten = TRUE, epoch=100)
	# 	Epoch: Iteration #1000 error is: 0.442440037547051
	  cmdsed10d.list <- make.clusterlist(cmdsed10d.tsne, 2.46) # 100 groups

		#
#
#
# Evaluate 2D and 3D Clusters
#		Use between 100 and 115 groups
#
		dpz.eval <- clust.eval(dpz.span2.list)
		dpz.data <- clust.data(dpz.span2.list)
		dpz.data.sc <- clust.data.sc(dpz.span2.list)
		#
		dsz.eval <- clust.eval(dsz.span2.list)
		dsz.data <- clust.data(dsz.span2.list)
		dsz.data.sc <- clust.data.sc(dsz.span2.list)
		#
		dez.eval <- clust.eval(dez.span2.list)
		dez.data <- clust.data(dez.span2.list)
		dez.data.sc <- clust.data.sc(dez.span2.list)
		#
		sed2.eval <- clust.eval(sed.span2.list)
		sed2.data <- clust.data(sed.span2.list)
		sed2.data.sc <- clust.data.sc(sed.span2.list)
		# 
		rawpearson.eval <- clust.eval(rawpearson.span2.list)
		rawpearson.data <- clust.data(rawpearson.span2.list)
		rawpearson.data.sc <- clust.data.sc(rawpearson.span2.list)
		# 
		sed3.eval <- clust.eval(sed.list)
		sed3.data <- clust.data(sed.list)
		sed3.data.sc <- clust.data.sc(sed.list)
		# 
		spearman.eval <- clust.eval(spearman.list)
		spearman.data <- clust.data(spearman.list)
		spearman.data.sc <- clust.data.sc(spearman.list)
		# 
		euclid.eval <- clust.eval(euclid.list)
		euclid.data <- clust.data(euclid.list)
		euclid.data.sc <- clust.data.sc(euclid.list)
		# 
		cmdsed3d.eval <- clust.eval(cmdsed3d.list)
		cmdsed3d.data <- clust.data(cmdsed3d.list)
		cmdsed3d.data.sc <- clust.data.sc(cmdsed3d.list)
		# 
		cmdsed10d.eval <- clust.eval(cmdsed10d.list)
		cmdsed10.data <- clust.data(cmdsed10d.list)
		cmdsed10d.data.sc <- clust.data.sc(cmdsed10d.list)
		#
		cmd2.sed.list <- make.clusterlist(negx.sed.ord2, 2.69)
		cmd2.sed.eval <- clust.eval(cmd2.sed.list)
		cmd2.sed.data.sc <- clust.data.sc(cmd2.sed.list)
		# 
		cmd3.sed.list <- make.clusterlist(sed.ord3, 6.9)  # 101
		cmd3.sed.eval <- clust.eval(cmd3.sed.list)
		cmd3.sed.data.sc <- clust.data.sc(cmd3.sed.list)
		#
		manclusteval <- clust.eval( mancluster.list)
		mancluster.data.sc <- clust.data.sc(mancluster.list)
		# 
#∞∞∞∞∞∞∞∞∞∞∞∞∞∞∞∞∞∞∞∞∞∞∞∞∞∞∞∞∞∞∞∞∞∞∞∞∞∞∞∞∞∞∞∞∞∞∞∞∞∞∞∞∞∞∞∞∞∞∞∞∞∞∞∞∞∞∞∞∞∞∞∞∞∞∞∞∞	
	#
	#  Combine groups
	#
	#   Pick top methods: Spearman Distance 2D t-SNE (dsz.span2.list, dsz.data.sc), Euclidian Distance 2D t-SNE (dez.span2.list, dez.data.sc); mancluster; fuzzy clustering Spearman ();
	#	Spearman-Euclid Distnace 2D t-SNE (sed.span2.list, sed2.data),  cluster_kmeans_Euclidean.csv, wjc k-means Euclid (wjc_kE.list, .data)
	
	intersect(sed.span2.list[[25]]$Gene.Name, dsz.span2.list[[38]]$Gene.Name)	# 4 genes
	intersect(intersect(sed.span2.list[[25]]$Gene.Name, dez.span2.list[[44]]$Gene.Name), intersect(sed.span2.list[[25]]$Gene.Name, dsz.span2.list[[38]]$Gene.Name))
	#	[1] "ALK"  "EML1"
	# ALK Group evaluations
	dpz.eval[dpz.eval$Group==38,]; dsz.eval[dsz.eval$Group==38,]; dez.eval[dez.eval$Group==44,]; sed2.eval[sed2.eval$Group==25,] 
	# dpz/dsz win by high index and low percent NA
	#
	# EGFR Group evaluations
	dpz.eval[dpz.eval$Group==17,]; dsz.eval[dsz.eval$Group==20,]; dez.eval[dez.eval$Group==10,]; sed2.eval[sed2.eval$Group==11,] 
	# dez wins
	#		
	# MET Group evaluations
	dpz.eval[dpz.eval$Group==70,]; dsz.eval[dsz.eval$Group==54,]; dez.eval[dez.eval$Group==4,]; sed2.eval[sed2.eval$Group==10,] 
	# dpz wins by low percent NA, dsz wins by Index, dez is huge (615, 95% NA), sed2 is 149, 88% NA
	#		
#	
	#  
	alk.comb <- plyr::join(data.frame(sed2.data[[25]]), data.frame(dsz.data[[38]]), by='Gene.Name', type="full")
	alk.comb.sc <- plyr::join(data.frame(sed2.data.sc[[25]]), data.frame(dsz.data.sc[[38]]), by='Gene.Name', type="full")


##
#	Focus attention on tyrosine kinases
#
	sfklist  <- c("BLK", "FGR", "FRK", "FYN", "HCK", "LCK", "LYN", "PTK6", "SRC", "YES1" )
	rtklist <- c("ALK", "LTK", "AXL", "MER", "TYRO3", "DDR1" , "DDR2", "EGFR", "ERBB2", "ERBB3", "ERBB4", "EPHA1" , "EPHA2", "EPHA3","EPHA4", "EPHA5", "EPHA6", "EPHA7", "EPHA8"  , "EPHB1", "EPHB2", "EPHB3"   , "EPHB4", "EPHB6", "EPHX", "FGFR1" , "FGFR2", "FGFR3", "FGFR4", "IGF1R"  , "INSR", "INSRR", "MET", "RON", "MUSK", "CSF1R"    , "FLT3", "KIT", "PDGFRA", "PDGFRB", "PTK7", "RET", "ROR1", "ROR2", "ROS1", "RYK", "TEK", "TIE", "NTRK1"  , "NTRK2" ,"NTRK3"  ,"VEGFR1", "VEGFR2", "VEGFR3", "AATYK" , "AATYK2", "AATYK3", "STYK1")
	fungenes <- sort(unique(c(fungenes, rtklist, sfklist)))
	lungrtks <- rownames(tbl)[rownames(tbl) %in% rtklist] #  31 RTKs
	lungsfks <- rownames(tbl)[rownames(tbl) %in% sfklist] #  all nine
	yks <- c(sfklist, rtklist)
	 #
#===>	  Which groups suggest cooperativity between RTKs and/or SFKs?
	 #
	 dszgenes.df <- ldply(dsz2d.list[dsz2d.eval$Group])
	dszyk <- dszgenes.df[dszgenes.df$Gene.Name %in% yks,]
	dszfreq <- count(dszyk, "group")
	which(dszfreq$freq > 1)
	dszfreq[which(dszfreq$freq > 1), "group"]
	dszyk.ints <- dszyk[dszyk$group %in% dszfreq[which(dszfreq$freq > 1), "group"],]
	 #
	 dezgenes.df <- ldply(dez2d.list[dez2d.eval$Group])
	dezyk <- dezgenes.df[dezgenes.df$Gene.Name %in% yks,]
	dezfreq <- count(dezyk, "group")
	dezyk.ints <- dezyk[dezyk$group %in% dezfreq[which(dezfreq$freq > 1), "group"],]	
	 #
	 sed2dgenes.df <- ldply(sed2d.list[sed2d.eval$Group])
	sed2yk <- sed2dgenes.df[sed2dgenes.df$Gene.Name %in% yks,]
	sedfreq <- count(sed2yk, "group")
	sedyk.ints <- sed2yk[sed2yk$group %in% sedfreq[which(sedfreq$freq > 1), "group"],]
	 #
	graph.cluster(clust.data.from.vector(dszyk.ints[which(dszyk.ints$group==23), "Gene.Name"], tbl))
	big <- graph.cluster(clust.data.from.vector(dezyk.ints[which(dezyk.ints$group==12), "Gene.Name"], tbl))
	tyro3 <- graph.cluster(cullbygene(big, "TYRO3"))
	axl <- graph.cluster(clust.data.from.vector(sedyk.ints[which(sedyk.ints$group==14), "Gene.Name"], tbl))
	axl <- graph.cluster(cullbygene(axl, "AXL")) # * useful, but AXL grouped with MET
	ddr <- graph.cluster(clust.data.from.vector(sedyk.ints[which(sedyk.ints$group==37), "Gene.Name"], tbl))
	ddr <- graph.cluster(cullbygene(ddr, "DDR2")) # *** useful
	dszgenes.df[grepl("DDR2", dszgenes.df$Gene.Name),] # 90
	graph.cluster(dsz2d.data.sc[90])
	dezgenes.df[grepl("DDR2", dezgenes.df$Gene.Name),] # 37
	graph.cluster(dez2d.data.sc[37])
	sed2dgenes.df[grepl("DDR2", sed2dgenes.df$Gene.Name),] # 37
	graph.cluster(sed2d.data.sc[37])
	ddr2 <- combine.clusters(dez2d.data.sc[37], dsz2d.data.sc[90])
	graph.cluster(cullbygene(ddr2, "DDR2"))
#	
#___________________________________________________________________________
#
#  Plot with RCY
#
	cyf <- cytoscape.file [,c(1, ncol(cytoscape.file))] 
	lung.graph <- plot.cy(cyf)
	lung.window <- CytoscapeWindow ("Lung_Cancer", graph=lung.graph)
	lung.window <- existing.CytoscapeWindow("Lung_Cancer", copy.graph.from.cytoscape.to.R=TRUE)  # if already open
	# note: with all attributes is still too slow!  - for Paul:	save(lung.graph,  file="LC_graph.RData")
	displayGraph(lung.window)
	setVisualStyle (lung.window, "default")
	nodeDprops (lung.window)
	hidePanel(cy, "Results")
	intensityprops (lung.window, cyf)
		setNodePosition(lung.window, as.character(cyf$Gene.Name), sed.ord2[,1], sed.ord2[,2])
		#  Plots for figure:
		setNodePosition(lung.window, as.character(cyf$Gene.Name), 50*negx.sed.ord3[,1], 50*negx.sed.ord3[,2])
  		fitContent (lung.window)
  		showGraphicsDetails (lung.window, TRUE)
		setNodePosition(lung.window, as.character(cyf$Gene.Name), 50*negx.sed.ord3[,1], 50*negx.sed.ord3[,3])
		setNodePosition(lung.window, as.character(cyf$Gene.Name), 50*dmz.ord3[,1], 50*dmz.ord3[,2])
		setNodePosition(lung.window, as.character(cyf$Gene.Name), 50*dmz.ord3[,1], 50*dmz.ord3[,3])
		setNodePosition(lung.window, as.character(cyf$Gene.Name), 50*negdsz[,1], 50*negdsz[,2])
		setNodePosition(lung.window, as.character(cyf$Gene.Name), 50*negdsz[,1], 50*negdsz[,3])
	setNodePosition(lung.window, as.character(cyf$Gene.Name), 50*sed.tsne2d[,1], 50*sed.tsne2d[,2])
 		fitContent (lung.window)
  		showGraphicsDetails (lung.window, TRUE)
		# good for figure, needs scaling
##	Set to Total.Phosphorylation	
 	selectNodes(lung.window, node.names=as.character(cyf$Gene.Name), preserve.current.selection=TRUE)
	lung.tsne <- createWindowFromSelection(lung.window, "lung cancer tsne", return.graph=TRUE)
	setNodePosition(lung.tsne, as.character(cyf$Gene.Name), 50*sed.tsne2d[,1], 50*sed.tsne2d[,2])
	# NOTE:will only work if return.graph=TRUE.
	setWindowSize(lung.window, 500, 500)
	#
##  Put edges in the tsne graph
	#  File: Lung_Cancer_Networks.cys in LC3_Figures
	PSP.df <- PSP.child(as.character(cyf$Gene.Name))
	stn <- get.String.edges(stringfile)
	gmn <- get.GM.edges (gmnet)
	sg <- rbind(stn, gmn)
	loadedges(lung.window, sg) 	# this takes a long time
	edgeDprops(lung.window)
	sgp.mt <- EDGE.MERGE (stn, gmn, PSP.df)  	
	load.an.edge (lung.tsne, sgp.mt)
#
	edgeDprops(lung.tsne)
	se_edgeprops_nolayout (lung.tsne, sgp.mt) 
	add.style.name <- "Lung Cancer Edges"
	copyVisualStyle (lung.window, "default", add.style.name)
    setVisualStyle (lung.tsne, add.style.name)	
    getVisualStyleNames (cy)
    	setWindowSize(lung.tsne, 500, 500)
	#
##  Now make sub-networks 
	#
	#   Layout
	setLayoutProperties (cy, "kamada-kawai-noweight", list (edge_attribute='Weight', weight_type=3, min_weight=min(sgp.mt$Weight), max_weight=max(sgp.mt$Weight), layout_passes=50, iterations_pernode=50, distance_strength=8008, rest_length=60, disconnected_strength=0.01, disconnected_rest_length=500, anticollisionStrength=10)) 
	RCytoscape::layoutNetwork (lung.tsne, "kamada-kawai-noweight")


		i=NULL
 	for (i in 1:dim(teste5)[1])  {
		clearSelection(lung.tsne)
	      genes <- as.character(span3.list[[teste5$Group[i]]]$Gene.Name) 
	      wintitle <- paste(noquote("t-SNE Group"), teste5$Group[i], sep=" ", collapse=NULL)
          selectNodes(lung.tsne, genes)
		w1 <- createWindowFromSelection(lung.tsne, wintitle, return.graph=FALSE)
		displayGraph(w1)
		setVisualStyle(w1, add.style.name)
		layoutNetwork (w1, "kamada-kawai-noweight")
 		fitContent(w1)
		} 
#####################################################################################
#
# Gene Ontology
# Use functions from Paul Shannon
#
	 getwd() # "/Users/Mark_Grimes/Documents/_Work/R_/Lung_Cancer/_tsne"
	    source("http://bioconductor.org/biocLite.R")
    biocLite("GO.db")
    biocLite("GOstats")
    library (GO.db)
	#library (Category) loaded automatically
	library (GOstats)
	library (org.Hs.eg.db)
	  params = new ("GOHyperGParams", geneIds=genes,  ontology=ontology, annotation=annotation,
                 universeGeneIds=universe, pvalueCutoff = pvalue, conditional=conditionalSearch,
                 testDirection = "over")
       genes <- noquote(span3.list[[teste5$Group[i]]]$Gene.Name)          
	   hgr <<- hyperGTest (params)#
	#	Make gene lists

		for (i in 1:dim(teste5)[1]) {
			filename = paste(noquote("t-SNEGroup_"), teste5$Group[i], noquote(".txt"), sep="", collapse=NULL)
			write.table(sort(as.character(span3.list[[teste5$Group[i]]]$Gene.Name)), file= filename, sep="\t", eol = "\n", quote = FALSE, row.names=FALSE, col.names=FALSE)
			}
		#GO
extract.GO <- function (GOtable)	{
	d <- GOtable
	a <- dlply (d, .(Term))
	for (i in 1:(length(a))) {		
		a1 <- data.frame(a[i])
		names(a1) <- names(d)
		if (i == 1) {
			Genes <- paste(noquote(a1$Gene))
			go.df <- a1[1, c(1,5)]
			go.df$Genes <- paste(noquote(Genes), collapse = ", ") }
		Genes <- paste(noquote(a1$Gene))
		go.df2 <- a1[1, c(1,5)]
		go.df2$Genes <- paste(noquote(Genes), collapse = ", ")
		go.df <- rbind (go.df, go.df2)
		cat(i, "\t", Genes ) }
		return (go.df[order(go.df$Count, decreasing=TRUE),])	 
	}		  
	#
########
 		# Question: can GO enrichment in random networks vs. clusters be differentiated?		
 		#
 		lcgenes <<- as.character (sapply (cyf$Gene.Name, function (id) org.Hs.egSYMBOL2EG [[id]]))
 		enrichments <- go.enrichment(egenes, 'BP', universe = lcgenes)
 		tbl.enrichments <- summary(enrichments)
 		randenrich <- go.enrichment(genes, 'BP', universe = lcgenes)
 		tbl.randenrich <- summary(randenrich)
 		randgo3 <-  tbl.randenrich[tbl.randenrich$Count>=2,]
 		numcolwise(mean)(randgo3)
 		#
 		randgenenames <- as.character(cyf[sample(2482, 30),"Gene.Name"])
 		genes <<- as.character (sapply (randgenenames, function (id) org.Hs.egSYMBOL2EG [[id]]))
 		tbl.go <<- tabular.go.enrichment (genes, ontology='BP', pvalue=0.01, geneUniverse=lcgenes)
	 	#  
	 	#  
	 		 	mean(unique(tbl.go$Count)) # 3.833333; 4.166667; 3; 2; 3.2
	 	#	If there is enrichment, the number of genes for significant terms should be > 2
	 	tbl.go3 <- tbl.go[tbl.go$Count>2,]; dim(tbl.go3) # 24  8;  27  8; 9 8; 6  8; 16  8
	 		 	mean(unique(tbl.go3$Count)) # 5;  4; 4.5; 3; 4.33333
	 			length(unique(tbl.go3$Term)) # 5; 7; 2; 2; 4
	 	lckgenes <- as.character(lcksed$Gene.Name)
	 	lcksymb <<- as.character (sapply (lckgenes, function (id) org.Hs.egSYMBOL2EG [[id]]))	
	 		lck.go <<- tabular.go.enrichment (lcksymb, ontology='BP', pvalue=0.01, geneUniverse=lcgenes)
 			 	mean(unique(lck.go$Count))  # 6.5
			 	lck.go3 <- lck.go[lck.go$Count>2,]; dim(lck.go) # 749   8
	 		 	mean(unique(lck.go3$Count)) # 7.5
				length(unique(lck.go3$Term))  # 135 / 18 genes = 7.5 GO terms / gene
				7.5/0.3478717 =  21.55967		fold over random
				#
		ltbl.e <- extract.GO(lck.go3)	
		write.table(ltbl.e, file= "LCK_filtered_GO.txt", sep="\t", eol = "\n", quote = FALSE, row.names=FALSE, col.names=TRUE)
	 	
	 	egfrgenes = c( "GPRC5A", "MUC1",   "PXN",    "LYN",    "CTNND1", "EGFR",   "ACTB",   "DDR1",   "PRKCD",  "GAB1",   "TLN1",   "PDHA1",  "MAPK13")
 		egenes <<- as.character (sapply (egfrgenes, function (id) org.Hs.egSYMBOL2EG [[id]]))
 		# 
 		etbl.go <<- tabular.go.enrichment (egenes, ontology='BP', pvalue=0.01)
 			 	mean(unique(etbl.go$Count))  # 5.8
			 	etbl.go3 <- etbl.go[etbl.go$Count>2,]; dim(etbl.go3) # 244   8
	 		 	mean(unique(etbl.go3$Count)) # 6.875
				length(unique(etbl.go3$Term))  # 49 / 13 genes = 3.769231 GO terms / gene
				#3.769231/0.3478717  = 10.83512 fold over bkg
		etbl.e <- extract.GO(etbl.go3)	
		write.table(etbl.e, file= "EGFR_filtered_GO.txt", sep="\t", eol = "\n", quote = FALSE, row.names=FALSE, col.names=TRUE)
				
				
				#
 		mgenes <<- as.character (sapply (as.character(filtermet$Gene.Name), function (id) org.Hs.egSYMBOL2EG [[id]]))
 		mtbl.go <<- tabular.go.enrichment ( mgenes, ontology='BP', pvalue=0.01)
 			 	mean(unique(mtbl.go$Count))  # 8.333333
			 	mtbl.go3 <- mtbl.go[mtbl.go$Count>2,]; dim(mtbl.go3) # 331   8
	 		 	mean(unique(mtbl.go3$Count)) # 9.7
				length(unique(mtbl.go3$Term))  # 52 / 30 =  1.733333 terms per gene
				# 4.982679 fold over random
		mtbl.e <- extract.GO(mtbl.go3)	
		write.table(mtbl.e, file= "MET_filtered_GO.txt", sep="\t", eol = "\n", quote = FALSE, row.names=FALSE, col.names=TRUE)
	
		algenes <<- as.character (sapply (as.character(alkgenes), function (id) org.Hs.egSYMBOL2EG [[id]]))
		#
 		altbl.go <<- tabular.go.enrichment (algenes, ontology='BP', pvalue=0.01)#, geneUniverse=lcgenes)
 					 	mean(unique(altbl.go$Count))  #  6; 5.25 w/lcgenes
			 	altbl.go3 <- altbl.go[altbl.go$Count>2,] # ; dim(altbl.go3) # 23   8  
	 		 	mean(unique(altbl.go3$Count)) #  7.5; 6.3
				length(unique(altbl.go3$Term))  #  8 / 26 = 0.3076923 GO terms per gene, not diff. from random (4 lcgenes)
		alktbl.e <- extract.GO(altbl.go3)	
		write.table(alktbl.e, file= "ALK_filtered_GO.txt", sep="\t", eol = "\n", quote = FALSE, row.names=FALSE, col.names=TRUE)
# 		Go terms from 
	# 	sed2d = 137 groups
	setwd("sed2dGO")
		# write gene names into text file 
				#
		genefile <- file("sed2Dgroupnames.txt", "w")
		for (i in 1:dim(sed2d.eval)[1]) {
			cat(noquote("t-SNE 2D Group"), sed2d.eval$Group[i], "\n", file= genefile, sep="\t")
			cat(as.character(sed2d.list[[sed2d.eval$Group[i]]]$Gene.Name), file= genefile, sep="\n") }
		close(genefile) 	
	# write GO summaries
		for (i in 1:dim(sed2d.eval)[1]) {		
			listname = paste(noquote("sed2DGroup_"), sed2d.eval$Group[i], noquote(".txt"), sep="", collapse=NULL)
			syms <<- as.character(sed2d.list[[sed2d.eval$Group[i]]]$Gene.Name)
			genelist <<- as.character (sapply (syms, function (id) org.Hs.egSYMBOL2EG [[id]]))
			tbl.go <<- tabular.go.enrichment (genelist, ontology='BP', pvalue=0.01)
			tbl.go2 <- tbl.go[tbl.go$Count>=2,]
			if(nrow(tbl.go2)<1) next
		 	print(i)
			#
			# Make a GO table with GO terms, count, and genes
	 		nametitle <- paste(noquote("sed2DGroup_"), sed2d.eval$Group[i], noquote('_GOSummary.txt'), sep="", collapse=NULL)
 			d <-    unique (tbl.go2)
 			print(d)
			GO.df <- extract.GO (d)
			write.table(GO.df, file= nametitle, sep="\t", eol = "\n", quote = FALSE, row.names=FALSE, col.names=TRUE)
			next
		}
####
#~~~~~~
#		Random GO term retrieval
	#  	Obtain random genes from the lung cancer data set
			seed <- sample(10:35, 1)
			 randgenenames <- as.character(cyf[sample(2482, seed),"Gene.Name"])
			#
		randgo.list <- as.list(NULL)
		randgo.df=data.frame(NULL)
			for(k in 1:length(randgenes.list)) {
				genes <- as.character (sapply (as.character(randgenes.list[[k]]$Gene.Name), function (id) org.Hs.egSYMBOL2EG [[id]]))
				tbl.go <<- tabular.go.enrichment (genes, ontology='BP', pvalue=0.01, geneUniverse=lcgenes)
				tbl.go2 <- tbl.go[tbl.go$Count>=2,]
				randgo.list[[k]] <- tbl.go2
				randgo.df[k,1] <- length(unique(genes))
				randgo.df[k,2] <- length(unique(tbl.go2$Term))
				randgo.df[k,3] <- mean(unique(tbl.go2$Count)) 
				randgo.df[k,4] <- mean(unique(tbl.go2$Count)/unique(tbl.go2$Expected)) 
				 # 
			}
			names(randgo.df) <- c("genes", "GO.terms", "mean.count", "mean.count.over.expected")
			randgo <- randgo.df
			randgo$mean.count[is.nan(randgo$mean.count)] <- 0
			randgo$mean.count.over.expected[is.nan(randgo$mean.count.over.expected)] <- 0
			mean(randgo$GO.terms)  # 7.76
			sd(randgo$GO.terms)  #  8.747762
			mean(randgo$mean.count)  #$  3.498667
			sd(randgo$mean.count)  #  2.06647
			mean(randgo$mean.count.over.expected)  # 18.34359
			sd(randgo$mean.count.over.expected)  # 10.89013
			randgo$GOterms.per.gene <- randgo$GO.terms/randgo$genes
			mean(randgo$GOterms.per.gene)  # 0.3478717
			sd(randgo$GOterms.per.gene)  # 0.3464063
			#

#___________________________________________________________________________
##
#	EDGES: COMPARE TO RANDOM SAMPLE FROM DATA SET
##		File = "LC_RandomNetworks.cys"
#			use sg network (see Dist_Matrix10.R) that does not include PSP
		#  Make a list for random genes and random clusters like other clusterlists
		#
		randedges.list <- as.list(NULL)
		randcount=data.frame(NULL)
		rand.df=data.frame(NULL)
		for(i in (11:35))		{
			j = i-10
			tnet.edges = NULL
			tnet <- subclone.net(as.character(cyf[sample(2482, i), "Gene.Name"]), 'Lung_Cancer')
		 		randcount[j,1] <- getNodeCount(tnet)
		 		randcount[j,2] <- getEdgeCount(tnet)
		 		rand.temp <- data.frame(getAllNodes(tnet))
				rand.temp$group <- i
				names(rand.temp) <- c("Gene.Name", "group")
				rand.df <- rbind(rand.df, rand.temp)
		 		if (getEdgeCount(tnet)>0) {
		 			tnet.edges <- getAllEdgeAttributes(tnet)
					randedges.list[[i]] <- tnet.edges
					randcount[j,3] <- sum(tnet.edges$Weight) 
					randcount[j,4] <- sd(tnet.edges$Weight)	} else {
					randcount[j,3] <- 0
					randcount[j,4] <- NA
					randedges.list[[j]] <- NA
				}
				}
				randgenes.list <- dlply(rand.df, .(group))  # GROUP LIST  !
				randclusters <- clust.data.sc(randgenes.list)
				#
		names(randcount) <- c("nodes", 'edges', "sum.edge.wt", 'sd.weight')
				randcount$weight.per.node <- randcount$sum.edge.wt / randcount$nodes
				randcount$edges.per.node <- randcount$edges / randcount$nodes
				#
				mean(randcount$weight.per.node)  # 0.001905436
				sd(randcount$weight.per.node)  # 0.006730378
				mean(randcount$edges.per.node)  # 0.06933429  # median 0
				sd(randcount$edges.per.node)  # 0.1257939
				mean(rand1$weight.per.node)  # 0.00195733
				sd(rand1$weight.per.node)  # 0.006870023
				mean(rand1$edges.per.node)  # 0.06012644
				sd(rand1$edges.per.node)  # 0.1195841
			mean(c(0.001905436,  0.00195733))  # average mean edge weight 0.001931383
			mean(c(0.06933429, 0.06012644))  # average mean edges 0.06473037
			mean(c(0.006730378,  0.006870023))  # average sd edge weight 0.006800201
			mean(c(0.1257939, 0.1195841))  # average sd 0.122689
		
# Reviewer's suggestion:
# "As an alternative, I suggest using the following simple formula for assessing the number of in-cluster links expected by chance:
# N_expected = No_of_edges_of_cluster's_genes__TOTAL^2 / (2* No_of_all_network_edges_TOTAL)
# It works sufficiently well (N_expected is then compared to N_observed with chi-square). "
	totaledgednodes = unique (c(as.character(sg$Gene.1), as.character(sg$Gene.2))) # 908 nodes
	totalnodes = as.character(cyf$Gene.Name)
	# Met 130 edges / 30 nodes 
	# selecting met returns 
	met1 = sg[grepl("MET", sg$Gene.1),]
	met2 = sg[grepl("MET", sg$Gene.2),]
	met <- rbind(met1,met2) # dim (met)  175  edges
	# edges in metgenes (from above)
	metclustnet <- rbind(sg[sg$Gene.1 %in% metgenes,], sg[sg$Gene.2 %in% metgenes,]) # 2089 edges
	expected <- (dim(metclustnet)[1]^2)/(2*dim(sg)[1])  # 105.7254
	metclust <- metclustnet[metclustnet$Gene.1 %in% metgenes,]
	metclust <- metclust[metclust$Gene.2 %in% metgenes,] # 
	 observed = dim(metclust)[1]  # 355
	# alkgenes 
	alkclustnet <- rbind(sg[sg$Gene.1 %in% alkgenes,], sg[sg$Gene.2 %in% alkgenes,]) # 2089 edges
	expected <- (dim(alkclustnet)[1]^2)/(2*dim(sg)[1])  # 34.82898
	alkclust <- alkclustnet[alkclustnet$Gene.1 %in% alkgenes,]
	alkclust <- alkclust[alkclust$Gene.2 %in% alkgenes,] # 
	 observed = dim(alkclust)[1]  # 42
	# lckgenes <- as.character(lcksed$Gene.Name)
	lckclustnet <- rbind(sg[sg$Gene.1 %in% lckgenes,], sg[sg$Gene.2 %in% lckgenes,]) # 2089 edges
	expected <- (dim(lckclustnet)[1]^2)/(2*dim(sg)[1])  # 127.605
	lckclust <- lckclustnet[lckclustnet$Gene.1 %in% lckgenes,]
	lckclust <- lckclust[lckclust$Gene.2 %in% lckgenes,] # 
	 observed = dim(lckclust)[1]  # 250
	# egfrgenes
	egfrclustnet <- rbind(sg[sg$Gene.1 %in% egfrgenes,], sg[sg$Gene.2 %in% egfrgenes,]) # 2089 edges
	expected <- (dim(egfrclustnet)[1]^2)/(2*dim(sg)[1])  # 68.70472
	egfrclust <- egfrclustnet[egfrclustnet$Gene.1 %in% egfrgenes,]
	egfrclust <- egfrclust[egfrclust$Gene.2 %in% egfrgenes,] # 
	 observed = dim(egfrclust)[1]  # 136
	 #
	# chi square test -  
	expected = c(105.7254, 34.82898, 127.605, 68.70472)
	observed = c(355, 42, 250, 136)
	x = cbind (observed, expected)
			chisq.test(x)
			# X-squared = 23.2986, df = 3, p-value = 3.499e-05
	x2 <- as.table(rbind(observed, expected))
		colnames(x2)=c("MET", "ALK", "PTK2", "EGFR")
			x2sq <- chisq.test(x2)
			# X-squared = 23.2986, df = 3, p-value = 3.499e-05
	 x2.a <- rbind(x2, observed/expected, observed-expected)
	 rownames(x2.a)[3:4] <- c("ratio", "difference")
	 x2.b <- x2.a[c(1, 2, 4), c(3, 4, 1, 2)]
	#	
	#               PTK2      EGFR      MET      ALK
#	observed   	250.000 136.00000 355.0000 42.00000
#	expected   	127.605  68.70472 105.7254 34.82898
#	difference 	122.395  67.29528 249.2746  7.17102
#
