# Supplementary material for: Wrangling Phosphoproteomic Data to Elucidate Cancer Signaling Pathways
Source: PLOS journal article supplement (doi:10.1371/journal.pone.0052884), 2013-01-03
Supplement: S3 (10.1371/journal.pone.0052884.s003) [file journal.pone.0052884.s003]

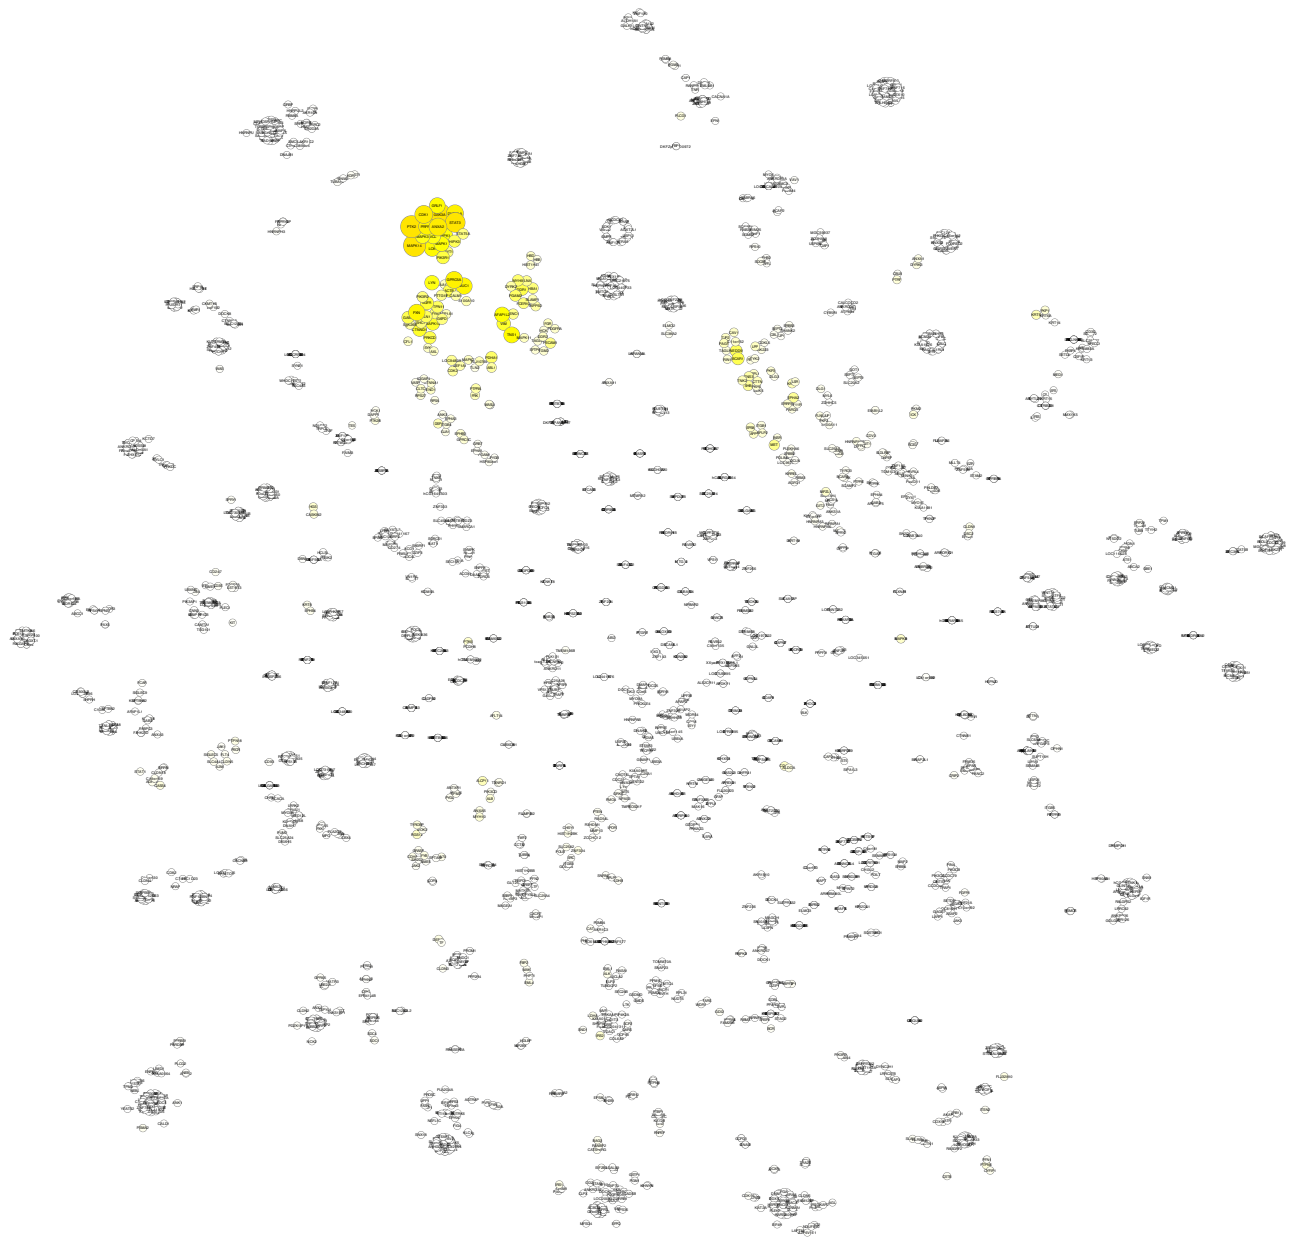

Figure S3
